# Supplementary material
Source: PubMed Central journal article supplement (PMC4598179)
Supplement: NIHMS726612-supplement-Appendix_A.pdf [file NIHMS726612-supplement-Appendix_A.pdf]

## Appendix A

### Participant characteristics for individuals with aphasia.

| Participant Code | Sex | Age | Dx                                                 | Fluency   | WAB AQ (100) | BNT (60)         | RCPM (36) | RCBA (1 <sup>st</sup> 4 subtests) (40) |
|------------------|-----|-----|----------------------------------------------------|-----------|--------------|------------------|-----------|----------------------------------------|
| 107              | M   | 59  | L MCA thrombotic CVA                               | Nonfluent | 14.2         | 32               | 36        | 39                                     |
| 108              | F   | 56  | CVA                                                | Nonfluent | 22           | CNE<br>2°<br>AOS | 32        | 34                                     |
| 109              | F   | 34  | Brain tumor resection, with subsequent CVA         | Nonfluent | 53.9         | 6                | 28        | 34                                     |
| 122              | M   | 70  | CVA                                                | Fluent    | 44.5         | 4                | 36        | 36                                     |
| 123              | F   | 75  | CVA                                                | Nonfluent | 34.45        | 15               | 27        | 31                                     |
| 125              | M   | 52  | CVA                                                | Fluent    | 86.3         | 49               | 33        | 39                                     |
| 135              | M   | 66  | CVA                                                | Fluent    | 98           | 59               | 30        | 37                                     |
| 137              | F   | 58  | CVA                                                | Fluent    | 98           | 58               | 34        | DNT – assumed WNL                      |
| 138              | F   | 76  | Left basal ganglia parenchymal hemorrhage          | Fluent    | 82.8         | 24               | 20        | 38                                     |
| 159              | F   | 64  | CVA                                                | Fluent    | 81.3         | 49               | 36        | 38                                     |
| 160              | M   | 58  | CVA                                                | Fluent    | 78.2         | 28               | 35        | 36                                     |
| 161              | M   | 70  | CVA                                                | Fluent    | 68.8         | 38               | 27        | 34                                     |
| 162              | M   | 64  | CVA                                                | Nonfluent | 83.4         | 54               | 34        | 40                                     |
| 164              | F   | 82  | L MCA CVA                                          | Fluent    | 87           | 35               | 29        | 38                                     |
| 165              | F   | 44  | CVA                                                | Nonfluent | 72.7         | 24               | 29        | 18                                     |
| 170              | M   | 57  | Subarachnoid hemorrhage s/p LMCA aneurysm clipping | Fluent    | 21.7         | 2                | 30        | 27                                     |
| 172              | M   | 57  | CVA                                                | Nonfluent | 7.4          | DNT              | 33        | 7                                      |
| 187              | M   | 73  | L ICA occlusion                                    | Nonfluent | 68.5         | 31               | 37        | 30                                     |
| 191              | M   | 71  | CVA                                                | Fluent    | 87.4         | 46               | 35        | 39                                     |
| 192              | F   | 65  | CVA                                                | Fluent    | 83.8         | 35               | 31        | 40                                     |
| 194              | M   | 29  | CVA                                                | Nonfluent | 73.7         | 37               | 36        | 39                                     |

*Note.* Numbers in parentheses in the top row indicate the maximum number of points possible on the assessment.
